# Supplementary material for: Organometallic turnstiles: acid and base locking and unlocking
Source: Royal Society of Chemistry journal article supplement (doi:10.1039/c3dt51996a), 2013-09-25

## **Electronic Supplementary Information**

Nicolas Zigon, Nathalie Kyritsakas and Mir Wais Hosseini

Laboratoire de Tectonique Moléculaire (UMR 7140), Université de Strasbourg,

Institut Le Bel, 4 rue Blaise Pascal, 67000 Strasbourg, France

Tel: +33 3 68 85 13 23

Fax: + 33 3 68 85 13 25

E-mail: [hosseini@unistra.fr](mailto:hosseini@unistra.fr)

## Characterization for compound 1

$^1\text{H-NMR}$  ( $\text{CD}_2\text{Cl}_2$ , 400 MHz, 298K)

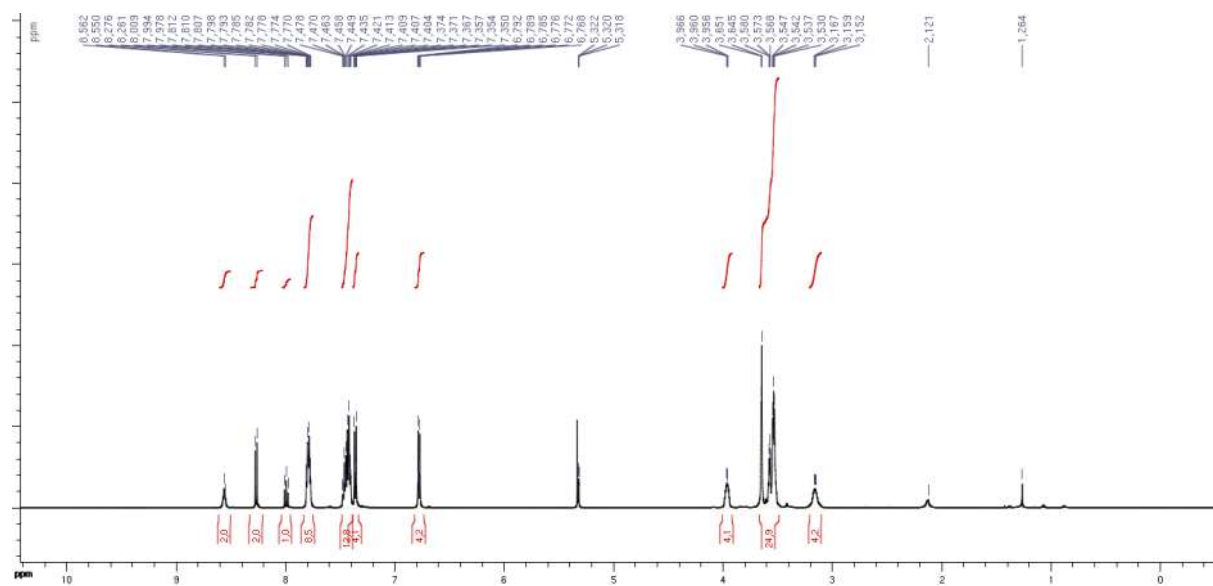

$^{31}\text{P-NMR}$  ( $\text{CD}_2\text{Cl}_2$ , 162 MHz, 298K)

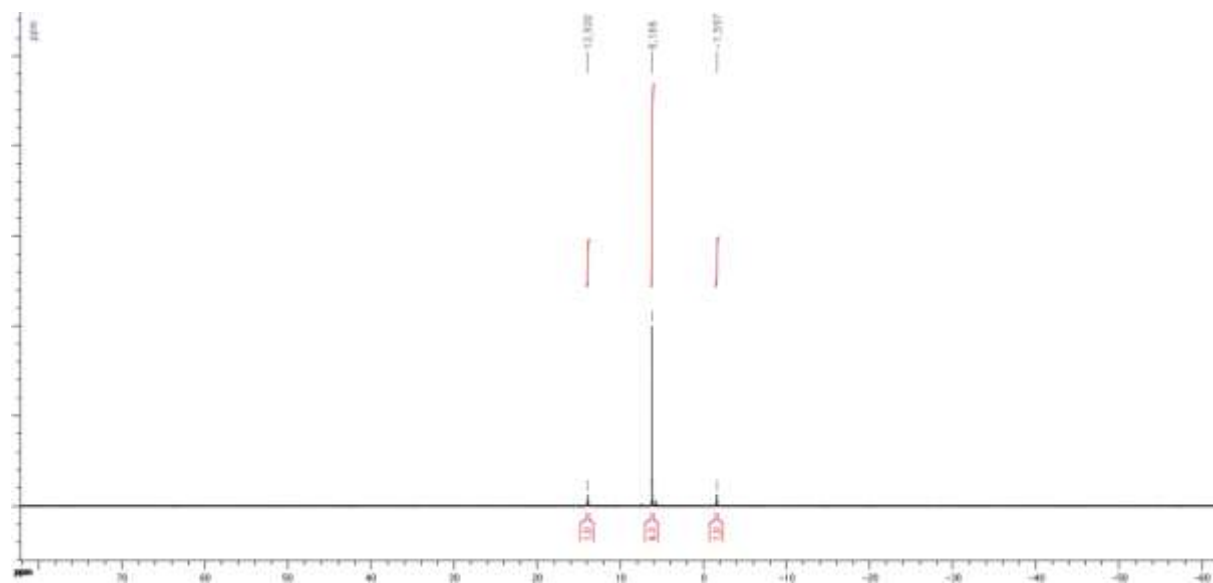

$^{13}\text{C}$ -NMR ( $\text{CD}_2\text{Cl}_2$ , 125 MHz, 298K)

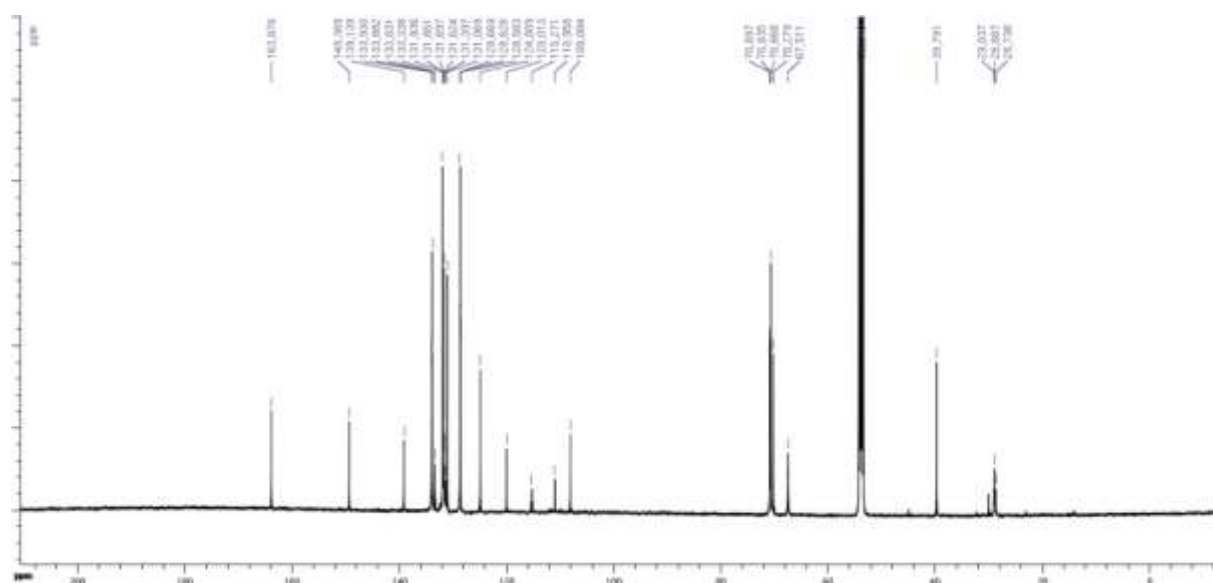

ESI-MS spectrum

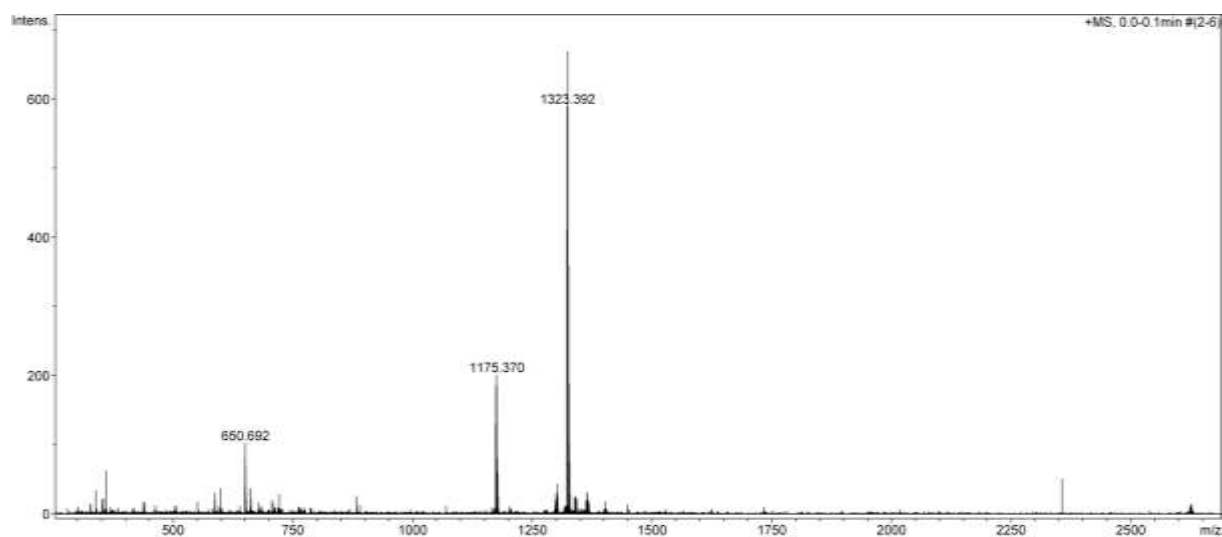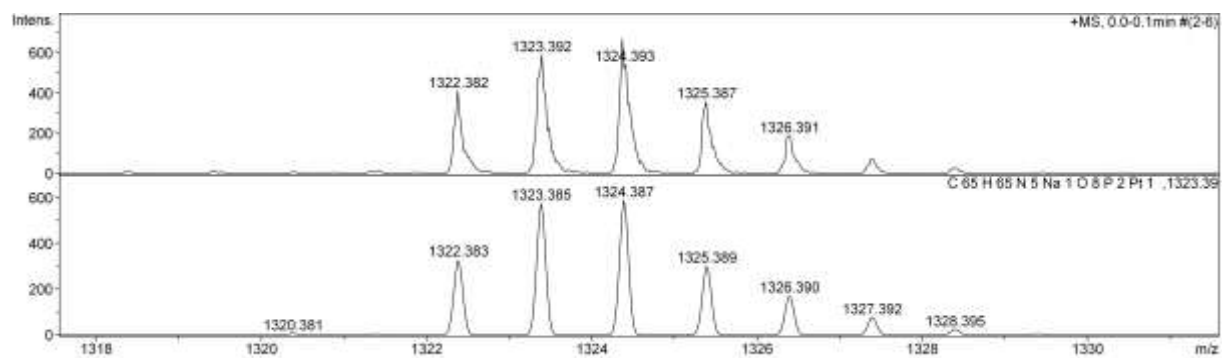

## Characterization for complex 1-Pd

$^1\text{H-NMR}$  ( $\text{CD}_2\text{Cl}_2$ , 400 MHz, 298K)

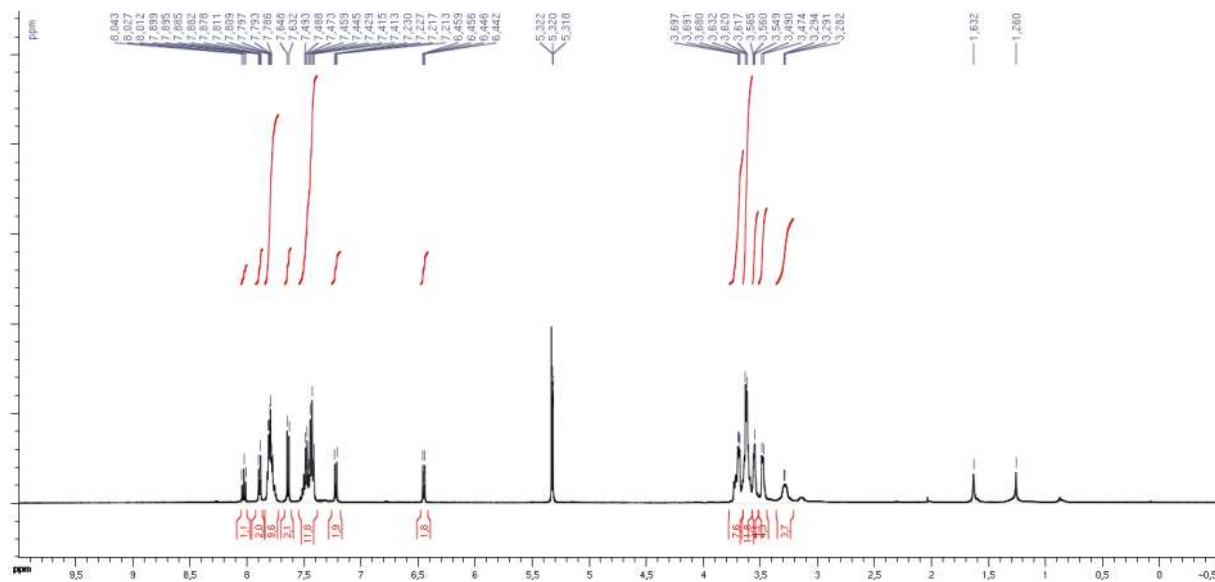

$^{31}\text{P-NMR}$  ( $\text{CD}_2\text{Cl}_2$ , 162 MHz, 298K)

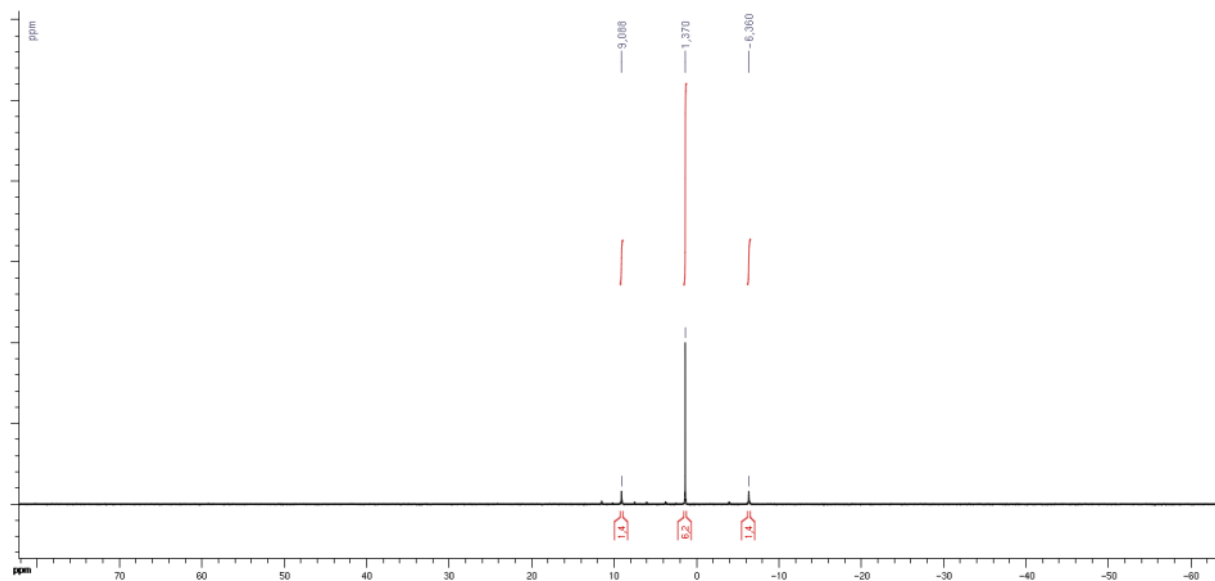

$^{13}\text{C}$ -NMR ( $\text{CD}_2\text{Cl}_2$ , 125 MHz, 298K)

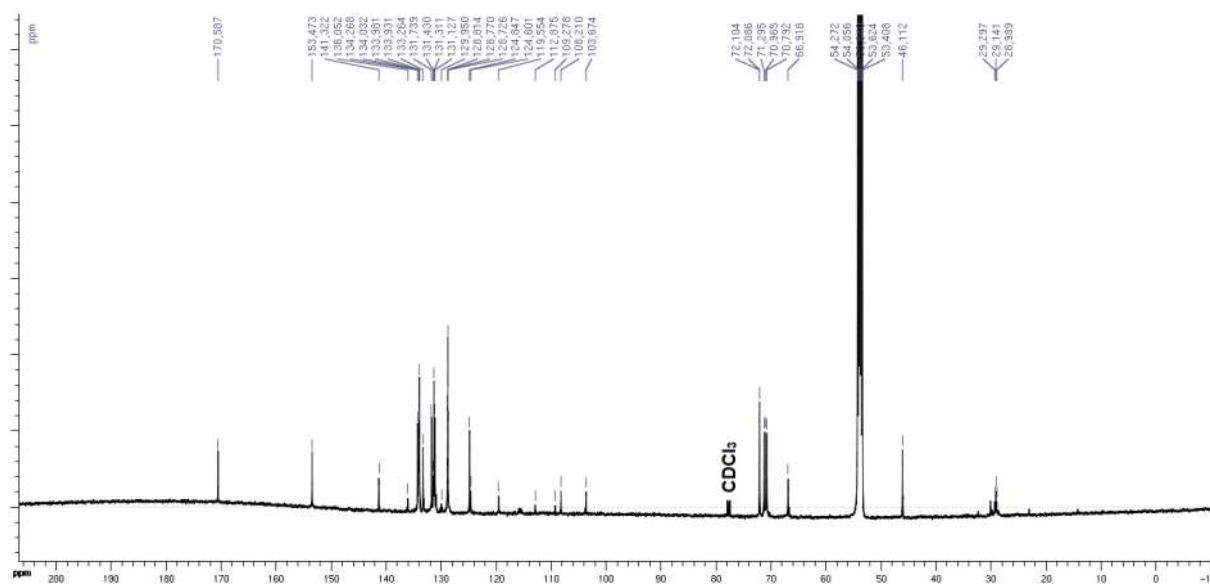

ESI-MS spectrum

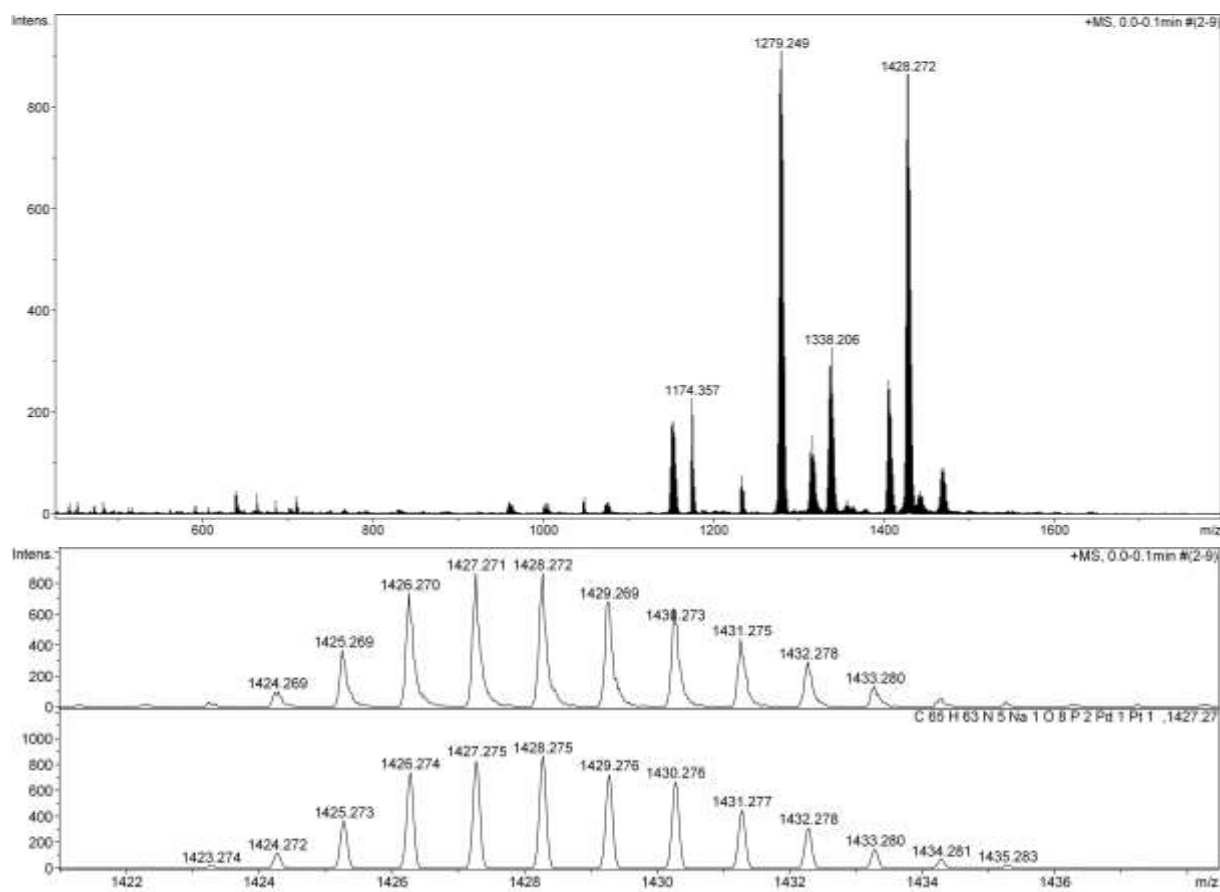

Supplement: c3dt51996a.pdf [file c3dt51996a.pdf]
